## **Imaging and manipulation of cytosolic ions and messengers during cell activation**

ALEC T. HAROOTUNIAN, JOSEPH P. Y. KAO, STEPHEN R. ADAMS AND ROGER Y. TSIEN

*Howard Hughes Medical Institute M-047 and Department of Pharmacology, University of California, San Diego, La Jolla, CA 92093, USA*

---

### **Summary**

Optical methods have recently become available for continuously imaging the free concentrations of important ions and second messengers such as calcium, sodium and hydrogen inside living cells. These ion levels are found to undergo remarkable changes upon stimulation of quiescent cells with growth factors known to stimulate phosphoinositide breakdown. In serum-starved REF-52 fibroblasts, growth factors such as serum, vasopressin, or PDGF (platelet-derived growth factor) cause intracellular  $[Na^+]_i$  to increase from about 4 mM to 8 mM. If mitogen treatment is combined with pharmacological depolarization of the membrane potential, repetitive  $[Ca^{2+}]_i$  spikes result in these rat fibroblasts. The mechanism of this oscillation has been investigated by light-flash release of intracellular messengers such as inositol 1,4,5-trisphosphate ( $Ins(1,4,5)P_3$ ),  $Ca^{2+}$ , and diacylglycerol, as well as more traditional biochemical techniques. The key feedback pathway appears to be  $Ca^{2+}$ -stimulation of phospholipase C production of  $Ins(1,4,5)P_3$ .

### **Introduction**

Recent technical advances now enable cytosolic free  $Ca^{2+}$  concentrations ( $[Ca^{2+}]_i$ ),  $Na^+$  concentrations ( $[Na^+]_i$ ), and pH to be continuously imaged inside individual living cells with micrometer spatial resolution and subsecond time resolution (for recent reviews see Tsien, 1988, 1989). This methodology relies on the molecular engineering of indicator dyes whose fluorescence is strong and highly sensitive to those ions (Grynkiewicz *et al.* 1985; Minta and Tsien, 1989; Rink *et al.* 1982). Binding of these ions shifts the fluorescence spectrum of the corresponding indicator. The ratio of excitation or emission amplitudes at two wavelengths measures the free ion concentration while canceling out intensity variations due to non-uniform cell thickness or dye content. A fluorescence microscope equipped to acquire images at two wavelengths and ratio them can thus produce dynamic images of intracellular messenger levels.

### **Results and discussion**

Currently our most fully developed use of this methodology is the analysis of the response of the REF-52 line of rat fibroblasts to mitogenic stimulation. Serum-starved cells typically show  $[Na^+]_i$  of only about 4 mM. Within a few minutes after addition of serum vasopressin, or PDGF,  $[Na^+]_i$  doubles to about 8 mM

Key words: cytosolic ions, messengers, cell activation.

(Harootunian *et al.* 1989a). This surprisingly large increase cannot be blocked by cytoplasmic alkalization, a finding that suggests that the  $\text{Na}^+$  influx is primarily due to pathways other than  $\text{Na}^+/\text{H}^+$  exchange. When similar mitogenic stimulation using serum, vasopressin, bradykinin, thrombin, bombesin or ATP is combined with membrane potential depolarization by gramicidin, high  $[\text{K}^+]$ , or sodium pump blockage, repetitive spikes of high  $[\text{Ca}^{2+}]_i$  result every few tens of seconds to minutes (Harootunian *et al.* 1988). Though these oscillations require static depolarization and  $\text{Ca}^{2+}$  influx, they do not involve cyclic fluctuations of membrane potential as in excitable cells, but rather rhythmic dumping of intracellular stores. Similar oscillations can be elicited without depolarization if  $\text{GTP}\gamma\text{S}$  (guanosine-5'-*O*-(3-thiotriphosphate) or  $\text{AlF}_4^-$  are administered to activate G proteins (Harootunian *et al.* 1989b). Many other cases of  $[\text{Ca}^{2+}]_i$  oscillations have been reported in other cell types (for reviews see Berridge and Galione, 1988; Berridge and Irvine, 1989; Rink and Hallam, 1989; Rink and Jacob, 1989), but the amenability of REF-52 cells to microinjection and the reproducibility and precise rhythm of their  $[\text{Ca}^{2+}]_i$  spikes make them an unusually favorable system for analyzing their biochemical mechanism. An essential adjunct to single-cell imaging is the ability suddenly to release  $\text{Ca}^{2+}$ , inositol 1,4,5-trisphosphate ( $\text{Ins}(1,4,5)\text{P}_3$ ), and diacylglycerol (DG) by photolysis of caged precursors.  $\text{Ca}^{2+}$  is released from the light-sensitive chelator nitr-7, whose high pre-photolysis affinity for  $\text{Ca}^{2+}$  makes it better for these experiments than the commercially available nitr-5 (Adams *et al.* 1988).  $\text{Ins}(1,4,5)\text{P}_3$  is generated by photocleavage of its 1-(2-nitrophenyl)ethyl ester (Walker *et al.* 1987); *sn*-1,2-dioctanoylglycerol is released by irradiation of its 2-nitro-4,5-dimethoxybenzyl ether.

Experiments were designed to differentiate between several oscillation mechanisms already proposed in the literature: (1) Cobbold and collaborators (Woods *et al.* 1987; Berridge *et al.* 1988) have suggested that phosphorylations due to protein kinase C are the dominant negative feedback mechanism controlling the interspike interval. (2) Berridge and collaborators (Berridge *et al.* 1988; Berridge and Irvine, 1989; Goldbeter *et al.* 1990) have proposed that  $\text{Ins}(1,4,5)\text{P}_3$  releases  $\text{Ca}^{2+}$  from one intracellular pool, causing  $\text{Ca}^{2+}$  overload and  $\text{Ca}^{2+}$ -dependent  $\text{Ca}^{2+}$  release (CICR) from an  $\text{Ins}(1,4,5)\text{P}_3$ -insensitive pool. (3) Payne *et al.* (1988) and Parker and Ivorra, (1990) have noted that high  $[\text{Ca}^{2+}]_i$  may inhibit the ability of  $\text{Ins}(1,4,5)\text{P}_3$  to release more  $\text{Ca}^{2+}$ ; this negative feedback could generate oscillations if some kinetic delays were introduced. (4) Meyer and Stryer (1988) have suggested that positive cooperativity of  $\text{Ins}(1,4,5)\text{P}_3$  in releasing  $\text{Ca}^{2+}$  from internal stores, together with  $\text{Ca}^{2+}$  stimulation of phospholipase C to generate more  $\text{Ins}(1,4,5)\text{P}_3$  (Eberhard and Holz, 1988), would be a potent feedback loop capable of generating oscillations.

Our current data suggest that the Meyer and Stryer (1988) model, with some modifications, is the most likely to describe the  $[\text{Ca}^{2+}]_i$  oscillations in REF-52 cells. This conclusion is based on the following key observations: (1) although phorbol esters do slow or inhibit oscillations, *cyclical* activation/deactivation of

protein kinase C does not seem necessary for the rhythm generation, since flash photolytic generation of diacylglycerol slows the rhythm for several successive cycles, not just the first after the flash. Also, protein kinase C can be thoroughly down-regulated by 12–24 h exposure to phorbol esters, after which oscillations can be produced as normal, though of course they can no longer be inhibited by reapplication of phorbol esters. (2) In the Berridge model,  $\text{Ins}(1,4,5)\text{P}_3$  levels are elevated in a steady non-oscillatory manner upon agonist stimulation. Sudden delivery of additional  $\text{Ins}(1,4,5)\text{P}_3$  should either have no effect, or, if it releases some  $\text{Ca}^{2+}$ , should advance the next cycle of CICR. In fact, photorelease of  $\text{Ins}(1,4,5)\text{P}_3$  elevates  $[\text{Ca}^{2+}]_i$  at all phases of the oscillation cycle and causes phase-resetting (and sometimes considerable delay) of the subsequent endogenous oscillations. Also, REF-52 cells are quite insensitive to the traditional pharmacological tests for CICR such as caffeine and ryanodine. Cells can be subjected to deliberate moderate to massive  $[\text{Ca}^{2+}]_i$  elevation, for example by wounding with a micropipet, but oscillations never result from such  $\text{Ca}^{2+}$  overload alone, and still require addition of the mitogenic hormone, presumably to stimulate  $\text{PIP}_2$  breakdown. (3) Photorelease of  $\text{Ca}^{2+}$  in oscillating cells causes not only an immediate but also a secondary rise in  $[\text{Ca}^{2+}]_i$  about 10 s later; the second phase is blocked by heparin, which is known to block  $\text{Ins}(1,4,5)\text{P}_3$  receptors (e.g. see Kobayashi *et al.* 1989). Also, in some microinjected cells, the endogenous oscillations can be seen to proceed as waves which are initiated at localized sites of high  $\text{Ca}^{2+}$ , due to imperfect resealing from the microinjection. Thus in REF-52 cells,  $\text{Ca}^{2+}$  exerts mainly *positive* feedback on its own release, and this is probably  $\text{Ins}(1,4,5)\text{P}_3$  mediated. (4)  $\text{GTP}\gamma\text{S}$  causes  $[\text{Ca}^{2+}]_i$  oscillations that proceed at lower  $[\text{Ca}^{2+}]_i$  levels and that are relatively independent of extracellular  $\text{Ca}^{2+}$ , an effect explicable by the reported ability of  $\text{GTP}\gamma\text{S}$  to shift the  $\text{Ca}^{2+}$ -activation curve of phospholipase C to lower  $\text{Ca}^{2+}$  concentrations (e.g. see Taylor and Exton, 1987). (5) We are attempting to synchronize the  $[\text{Ca}^{2+}]_i$  oscillations sufficiently so that direct assay of  $\text{Ins}(1,4,5)\text{P}_3$ , which necessarily must be done on large populations of cells, can show whether its levels oscillate as well.

Future investigations of intracellular signaling, especially to determine the functional significance of complex single-cell responses such as oscillations and spatial gradients, would be aided if further optical methods could be developed. For example, a light-sensitive  $\text{Ca}^{2+}$  chelator whose affinity could be reversibly cycled from high to low and back by different wavelengths of illumination (unlike current designs, which use irreversible photochemistry: Adams *et al.* 1988, 1989) would be useful for generating artificial oscillations and spatial gradients. Methods for measuring protein phosphorylation and reporter gene transcription at the single cell level would also be highly desirable to complement the imaging of second messenger signals.

## References

- ADAMS, S. R., KAO, J. P. Y., GRYNKIEWICZ, G., MINTA, A. AND TSIEN, R. Y. (1988). Biologically useful chelators that release  $\text{Ca}^{2+}$  upon illumination. *J. Am. chem. Soc.* **110**, 3212–3220.

- ADAMS, S. R., KAO, J. P. Y. AND TSIEN, R. Y. (1989). Biologically useful chelators that take up  $\text{Ca}^{2+}$  upon illumination. *J. Amer. chem. Soc.* **111**, 7957-7968.
- BERRIDGE, M. J., COBBOLD, P. H. AND CUTHBERTSON, K. S. R. (1988). Spatial and temporal aspects of cell signalling. *Phil. Trans. R. Soc. Lond B* **320**, 325-343.
- BERRIDGE, M. J. AND GALIONE, A. (1988). Cytosolic calcium oscillators. *Fedn Proc. Fedn Am. Socs exp. Biol. J.* **2**, 3074-3082.
- BERRIDGE, M. J. AND IRVINE, R. F. (1989). Inositol phosphates and cell signalling. *Nature* **341**, 197-205.
- EBERHARD, D. A. AND HOLZ, R. W. (1988). Intracellular  $\text{Ca}^{2+}$  activates phospholipase C. *Trends Neurosci.* **11**, 517-520.
- GOLDBETER, A., DUPONT, G. AND BERRIDGE, M. J. (1990). Minimal model for signal-induced  $\text{Ca}^{2+}$  oscillations and for their frequency encoding through protein phosphorylation. *Proc. natn. Acad. Sci. U.S.A.* **87**, 1461-1465.
- GRYNKIEWICZ, G., POENIE, M. AND TSIEN, R. Y. (1985). A new generation of  $\text{Ca}^{2+}$  indicators with greatly improved fluorescence properties. *J. biol. Chem.* **260**, 3440-3450.
- HAROOTUNIAN, A. T., KAO, J. P. Y. AND TSIEN, R. Y. (1988). Agonist-induced calcium oscillations in depolarized fibroblasts and their manipulation by photoreleased  $\text{Ins}(1,4,5)\text{P}_3$ ,  $\text{Ca}^{2+}$  and  $\text{Ca}^{2+}$  buffer. *Cold Spring Harbor Symposia on Quantitative Biology* **53**, 945-953.
- HAROOTUNIAN, A. T., KAO, J. P. Y., ECKERT, B. K. AND TSIEN, R. Y. (1989a). Fluorescence ratio imaging of cytosolic free  $\text{Na}^+$  in individual fibroblasts and lymphocytes. *J. biol. Chem.* **264**, 19458-19467.
- HAROOTUNIAN, A. T., KAO, J. P. Y. AND TSIEN, R. Y. (1989b). G-protein activation is sufficient to generate  $[\text{Ca}^{2+}]_i$  oscillations in REF52 fibroblasts. *J. Cell Biol.* **109**, 99a (abstr.)
- KOBAYASHI, S., KITAZAWA, T., SOMLYO, A. V. AND SOMLYO, A. P. (1989). Cytosolic heparin inhibits muscarinic and  $\alpha$ -adrenergic  $\text{Ca}^{2+}$  release in smooth muscle. *J. biol. Chem.* **264**, 17997-18004.
- MEYER, T. AND STRYER, L. (1988). Molecular model for receptor-stimulated calcium spiking. *Proc. natn. Acad. Sci. U.S.A.* **85**, 5051-5055.
- MINTA, A. AND TSIEN, R. Y. (1989). Fluorescent indicators for cytosolic sodium. *J. biol. Chem.* **264**, 19449-19457.
- PARKER, I. AND IVORRA, I. (1990). Inhibition by  $\text{Ca}^{2+}$  of inositol trisphosphate-mediated  $\text{Ca}^{2+}$  liberation: A possible mechanism for oscillatory release of  $\text{Ca}^{2+}$ . *Proc. natn. Acad. Sci. U.S.A.* **87**, 260-264.
- PAYNE, R., WALZ, B., LEVY, S. AND FEIN, A. (1988). The localization of calcium release by inositol trisphosphate in *Limulus* photoreceptors and its control by negative feedback. *Phil. Trans. R. Soc. Lond. B* **320**, 359-379.
- RINK, T. J. AND HALLAM, T. J. (1989). Calcium signalling in non-excitable cells: Notes on oscillations and store refilling. *Cell Calcium* **10**, 385-395.
- RINK, T. J. AND JACOB, R. (1989). Calcium oscillations in non-excitable cells. *Trends Neurosci.* **12**, 43-46.
- RINK, T. J., TSIEN, R. Y. AND POZZAN, T. (1982). Cytoplasmic pH and free  $\text{Mg}^{2+}$  in lymphocytes. *J. Cell Biol.* **95**, 189-196.
- TAYLOR, S. J. AND EXTON, J. H. (1987). Guanine-nucleotide and hormone regulation of polyphosphoinositide phospholipase C activity of rat liver plasma membranes. Bivalent cation and phospholipid requirements. *Biochem. J.* **248**, 791-799.
- TSIEN, R. Y. (1988). Fluorescence measurement and photochemical manipulation of cytosolic free calcium. *Trends Neurosci.* **11**, 419-424.
- TSIEN, R. Y. (1989). Fluorescent probes of cell signaling. *A. Rev. Neurosci.* **12**, 227-253.
- WALKER, J. W., SOMLYO, A. V., GOLDMAN, Y. E., SOMLYO, A. P. AND TRENTHAM, D. R. (1987). Kinetics of smooth and skeletal muscle activation by laser pulse photolysis of caged inositol 1,4,5-trisphosphate. *Nature* **327**, 249-252.
- WOODS, N. M., CUTHBERTSON, K. S. AND COBBOLD, P. H. (1987). Agonist-induced oscillations in cytoplasmic free calcium concentration in single rat hepatocytes. *Cell Calcium* **8**, 79-100.
